# Supplementary material
Source: Springer Nature journal article supplement (https://www.springermedizin.de/resource/supplementary/12913_2013_3035_MOESM10_ESM.pdf/9533284)

**Topic:** Exercise motivation - How dog-walking introduces you to others

**Quote:** *“Now, I do a lot of exercise, unfortunately, I’m on my own, single, I’ve a dog, so we walk about four hours a day.... You meet lots of people that way as well, who have diabetes and other illnesses and get to know things, what’s happening...”*

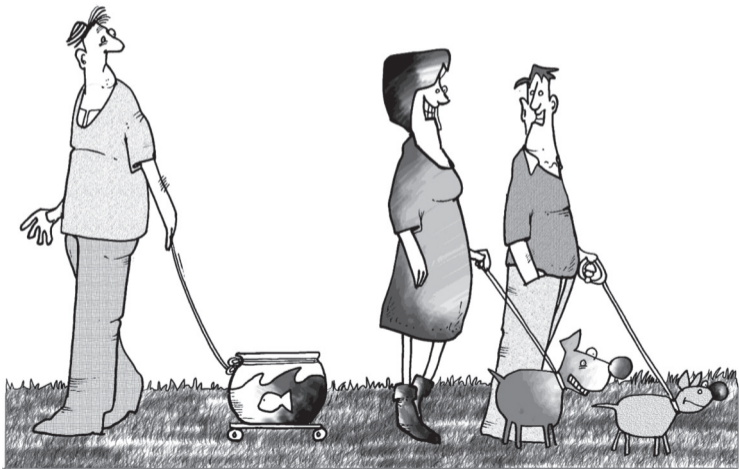

Supplement: MOESM10 [file 9533284]
